# Supplementary material for: Stabilization of a t-ZrO2 polymorph in a glassy SiO2 matrix at elevated temperatures accomplished by ceria additions
Source: Royal Society of Chemistry journal article supplement (doi:10.1039/c7dt01225j), 2017-01-01
Supplement: c7dt01225j1.pdf [file c7dt01225j1.pdf]

## “Supporting Information”

### **Stabilization of *t*-ZrO<sub>2</sub> polymorph in glassy SiO<sub>2</sub> matrix at elevated temperatures accomplished by Ceria additions**

S. Vasanthavel<sup>a,b</sup>, Brian Derby<sup>b</sup> and S. Kannan<sup>a\*</sup>

*<sup>a</sup>Centre for Nanoscience and Technology,  
Pondicherry University, Puducherry-605 014, INDIA*

*<sup>b</sup>School of Materials, University of Manchester  
Manchester, M13 9PL, UNITED KINGDOM*

#### **Contents:**

#### ***Supplementary figure***

- Fig. S1** XRD patterns of pure ZrO<sub>2</sub>-SiO<sub>2</sub> system at two different temperatures.
- Fig. S2** FEG-Scanning electron micrograph of PZS.
- Fig. S3** Point EDS spectra recorded for CZS50 and CZS100.

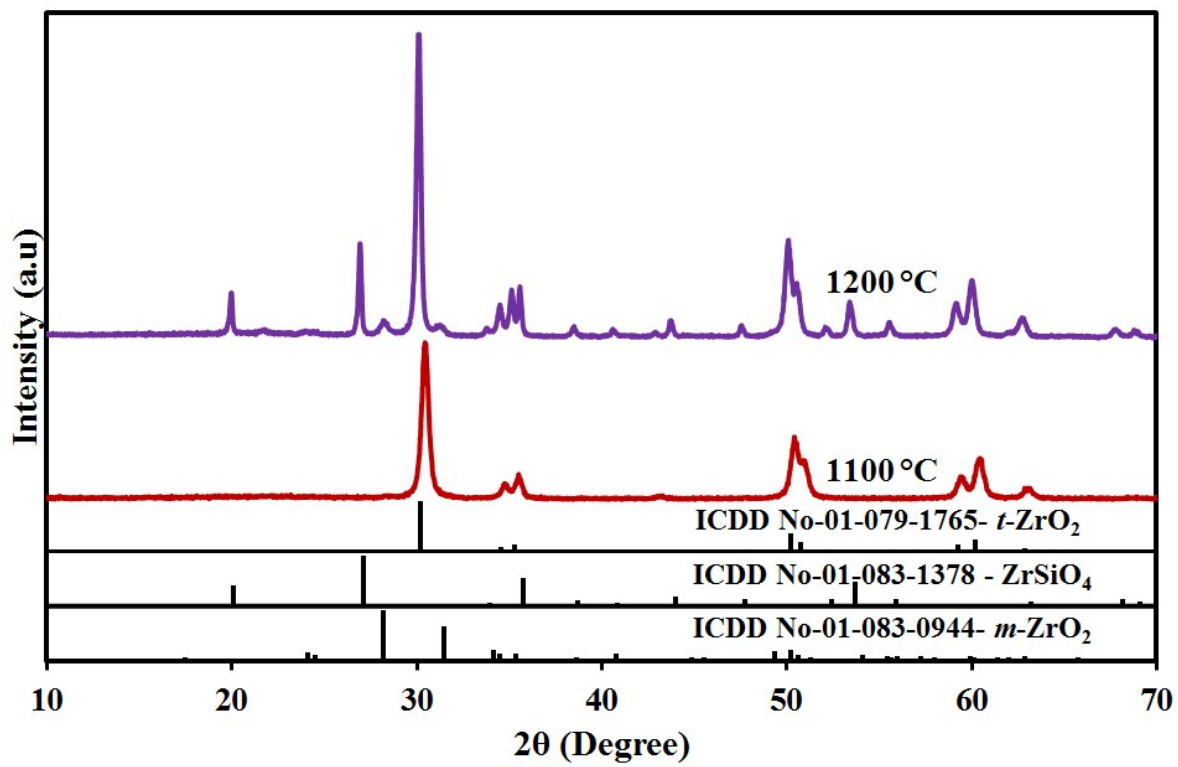

Fig. S1

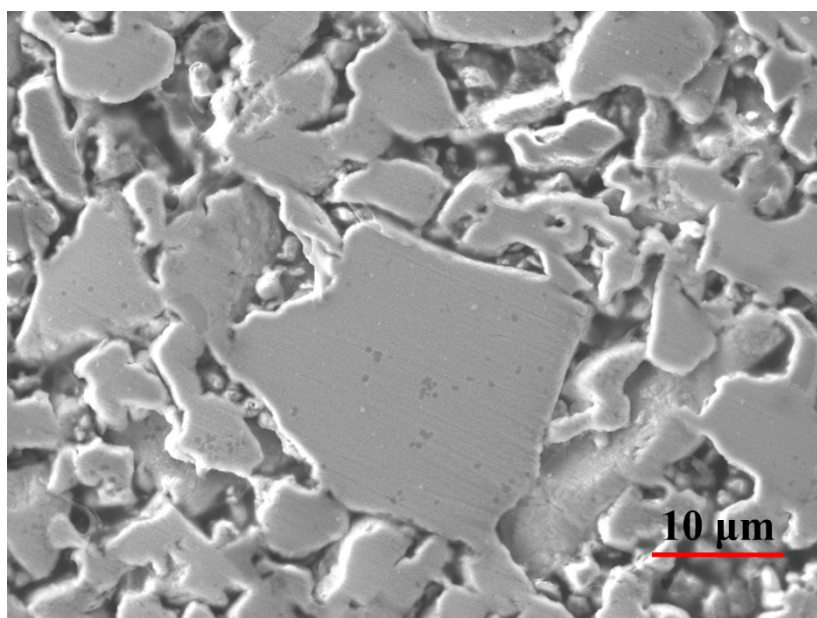

Fig. S2

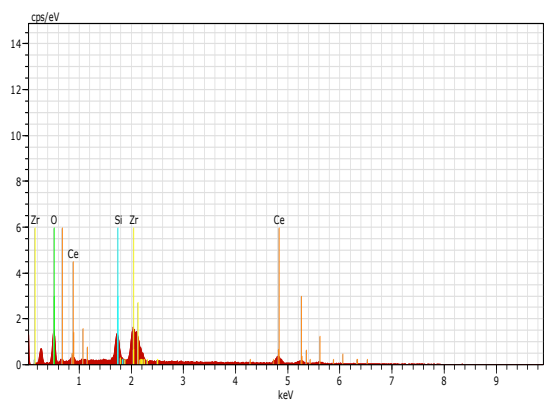

**CZS 50**

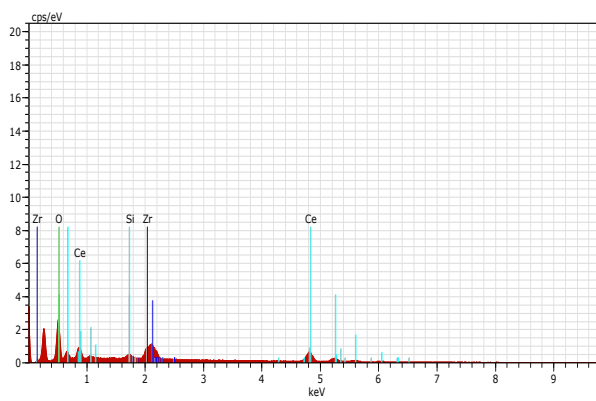

**CZS 100**

**Fig. S3**
